# Supplementary material
Source: PubMed Central journal article supplement (PMC3199944)
Supplement: NIHMS36819-supplement-supporting_info.pdf [file NIHMS36819-supplement-supporting_info.pdf]

# SUPPORTING INFORMATION

## Positive GABA<sub>A</sub> Receptor Modulators from *Acorus calamus* L. and Structural Analysis of (+)-Dioxosarcoguaiacol by 1D and 2D NMR and Molecular Modeling

Janine Zaugg<sup>†</sup>, Eva Eickmeier<sup>†</sup>, Samad Ebrahimi<sup>†</sup>, Igor Baburin<sup>‡</sup>, Steffen Hering<sup>‡</sup>, and Matthias Hamburger<sup>\*,†</sup>

<sup>†</sup>Division of Pharmaceutical Biology, University of Basel, Klingelbergstrasse 50, 4056 Basel, Switzerland

<sup>‡</sup>Departement of Pharmacology and Toxicology, University of Vienna, Althanstrasse 14, 1090 Vienna, Austria

\*To whom correspondence should be addressed. Tel: +41 61 267 1425. Fax: +41 61 267 1474.

E-mail: matthias.hamburger@unibas.ch

**Table S1.** Spectral characterization data for (1) (NMR spectra recorded in CDCl<sub>3</sub>)**β-Asarone**

CAS Nr.: 5273-86-9

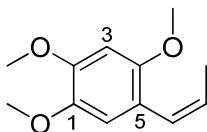 $m/z$  (ESITOFMS) 231.0998 [M+Na<sup>+</sup>] (Calc.: 231.0992)

| position               | $\delta_C^{a,b}$ | $\delta_H$ (I, m, J in Hz) <sup>a</sup> |
|------------------------|------------------|-----------------------------------------|
| 1                      | 142.6            | -                                       |
| 1-OCH <sub>3</sub>     | 56.5             | 3.57 (CH <sub>3</sub> , s)              |
| 2                      | 148.9            | -                                       |
| 2-OCH <sub>3</sub>     | 55.8             | 3.6 (CH <sub>3</sub> , s)               |
| 3                      | 98.4             | 6.30 (CH, s)                            |
| 4                      | 151.8            | -                                       |
| 4-OCH <sub>3</sub>     | 56.0             | 3.52 (CH <sub>3</sub> , s)              |
| 5                      | 118.0            | -                                       |
| 5-CH=CHCH <sub>3</sub> | 124.9            | 6.28 (CH, dq, 11.5, 2.0)                |
| 5-CH=CHCH <sub>3</sub> | 124.8            | 5.49 (CH, dq, 11.5, 7.0)                |
| 5-CH=CHCH <sub>3</sub> | 14.3             | 1.61 (CH <sub>3</sub> , dd, 7.0, 2.0)   |
| 6                      | 115.0            | 6.64 (CH, s)                            |

<sup>a</sup>Reference data can be found in A. Patra et al., J. Nat. Prod. 1981, 44, 668-669<sup>b</sup>Calculated <sup>13</sup>C shift of HSQC- and HMBC-NMR experiments. Spin systems evaluated by HSQC-NMR experiment

**Table S2.** Spectral characterization data for (3) (NMR spectra recorded in CDCl<sub>3</sub>)

**(+)-Shyobunone**

CAS Nr.: 21698-44-2

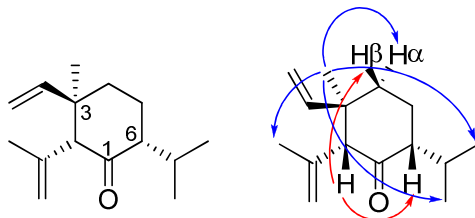

Relative configuration detected by 1D NOE NMR. Critical correlations highlighted by red and blue arrows.

$m/z$  (ESITOFMS) 243.1722 [M+Na<sup>+</sup>] (Calc.: 243.1719)

$[\alpha]_D$  (21.4°C) +100° ( $c = 0.19$ , CHCl<sub>3</sub>)<sup>a</sup>

| position                            | $\delta_C$ <sup>b,c</sup> | $\delta_H$ (I, m, J in Hz) <sup>c</sup>                                                             |
|-------------------------------------|---------------------------|-----------------------------------------------------------------------------------------------------|
| 1                                   | 209.6                     | -                                                                                                   |
| 2                                   | 66.9                      | 2.99 (CH, s)                                                                                        |
| 2-CCH <sub>2</sub> CH <sub>3</sub>  | 139.7                     | -                                                                                                   |
| 2-CCH <sub>2</sub> CH <sub>3</sub>  | 116.5                     | 4.70 (CH <sub>2</sub> , s)<br>4.93 (CH <sub>2</sub> , s)                                            |
| 2-CCH <sub>2</sub> CH <sub>3</sub>  | 24.1                      | 1.70 (CH <sub>3</sub> , s)                                                                          |
| 3                                   | 46.2                      | -                                                                                                   |
| 3-CH <sub>3</sub>                   | 18.9                      | 0.98 (CH <sub>3</sub> , s)                                                                          |
| 3-CHCH <sub>2</sub>                 | 146.6                     | 5.76 (CH, dd, 11.0, 17.8)                                                                           |
| 3-CHCH <sub>2</sub>                 | 110.7                     | 4.89 (CH <sub>2</sub> , dd, 11.0, 1.0)<br>4.91 (CH <sub>2</sub> , dd, 17.8, 1.0)                    |
| 4                                   | 39.3                      | H $\alpha$ : 1.56, CH <sub>2</sub> , m<br>H $\beta$ : 1.86, CH <sub>2</sub> , ddd (5.2, 13.2, 13.2) |
| 5                                   | 24.8                      | 1.59 (CH <sub>2</sub> , m)<br>1.96 (CH <sub>2</sub> , m)                                            |
| 6                                   | 56.4                      | 2.09 (CH, m)                                                                                        |
| 6-CH(CH <sub>3</sub> ) <sub>2</sub> | 26.3                      | 2.09 (CH, m)                                                                                        |
| 6-CH(CH <sub>3</sub> ) <sub>2</sub> | 18.3                      | 0.82 (CH <sub>3</sub> , d, 6.4)                                                                     |
| 6-CH(CH <sub>3</sub> ) <sub>2</sub> | 21.0                      | 0.86 (CH <sub>3</sub> , d, 6.4)                                                                     |

<sup>a</sup>No reference value could be found in literature. Relative configuration detected by 1D NOE NMR experiments. Important correlations highlighted by red (plain) and blue (dashed) arrows.

<sup>b</sup>Calculated <sup>13</sup>C shift of HSQC-NMR and HMBC-NMR experiments. Spin systems evaluated by HSQC-NMR experiment

<sup>c</sup>Reference data can be found in P. Weyerstahl et al. Liebigs Ann. Chem. 1987, 2, 89-101

**Table S3.** Spectral characterization data for (4) (NMR spectra recorded in CDCl<sub>3</sub>)**(+)-Preisocalamenediol**

CAS Nr.: 25645-19-6

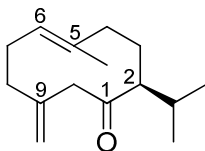 $m/z$  (ESITOFMS) 243.1731 [M+Na<sup>+</sup>] (Calc.: 243.1719)[ $\alpha$ ]<sub>D</sub> (20.3°C) +61.6° ( $c = 0.71$ , CHCl<sub>3</sub>)<sup>a</sup>

| position                            | $\delta_C^{b,c}$ | $\delta_H$ (I, m, J in Hz) <sup>a</sup> |
|-------------------------------------|------------------|-----------------------------------------|
| 1                                   | 207.2            | -                                       |
| 2                                   | 60.0             | 2.20 (CH, ddd, 1.0, 4.9, 10.9)          |
| 2-CH(CH <sub>3</sub> ) <sub>2</sub> | 30.5             | 1.61 (CH, m)                            |
| 2-CH(CH <sub>3</sub> ) <sub>2</sub> | 19.5             | 0.82 (CH <sub>3</sub> , d, 6.9)         |
|                                     | 20.5             | 0.77 (CH <sub>3</sub> , d, 6.9)         |
| 3                                   | 28.2             | 1.43 (CH <sub>2</sub> , dm, 13.5)       |
|                                     |                  | 2.03 (CH <sub>2</sub> , m)              |
| 4                                   | 40.6             | 1.75 (CH <sub>2</sub> , dt, 3.4, 12.8)  |
|                                     |                  | 1.98 (CH <sub>2</sub> , m)              |
| 5                                   | 137.9            | -                                       |
| 6                                   | 125.6            | 5.15 (CH, dd, 3.0, 10.7)                |
| 7                                   | 29.2             | 1.96 (CH <sub>2</sub> , m)              |
|                                     |                  | 2.11 (CH <sub>2</sub> , m)              |
| 8                                   | 36.7             | 1.94 (CH <sub>2</sub> , m)              |
|                                     |                  | 2.27 (CH <sub>2</sub> , m)              |
| 9                                   | 142.6            | -                                       |
| 10                                  | 53.4             | 2.85 (CH <sub>2</sub> , d, 14.8)        |
|                                     |                  | 3.21 (CH <sub>2</sub> , d, 14.8)        |
| 5-CH <sub>3</sub>                   | 15.2             | 1.30 (CH <sub>3</sub> , s)              |
| 9=CH <sub>2</sub>                   | 116.5            | 4.77 (CH <sub>2</sub> , s)              |
|                                     |                  | 4.90 (CH <sub>2</sub> , s)              |

<sup>a</sup>Reference value can be found in C. Zdero et al. Phytochemistry 1989, 28, 531-542<sup>b</sup>Calculated <sup>13</sup>C shift of HSQC- and HMBC-NMR experiments. Spin systems evaluated by HSQC-NMR experiment<sup>c</sup>Reference data can be found in D.M. Delvalle et al. Planta Med. 1987, 87, 230.

**Table S4.** Spectral characterization data for (**5**) (NMR spectra recorded in CDCl<sub>3</sub>)**(-)-Isoshyobunone**

CAS Nr.: 21698-46-4

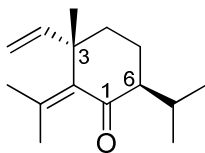 $m/z$  (ESITOFMS) 243.1730 [M+Na<sup>+</sup>] (Calc.: 243.1719)[ $\alpha$ ]<sub>D</sub> (21.5°C) -156° ( $c = 0.61$ , CHCl<sub>3</sub>)<sup>a</sup>

| position                            | $\delta_C$ <sup>b, c</sup> | $\delta_H$ (I, m, J in Hz) <sup>b, c</sup>                                                    |
|-------------------------------------|----------------------------|-----------------------------------------------------------------------------------------------|
| 1                                   | 209.4                      | -                                                                                             |
| 2                                   | 140.1                      | -                                                                                             |
| 3                                   | 44.4                       | -                                                                                             |
| 4                                   | 39.3                       | 1.33 (CH <sub>2</sub> , ddd, 14.0, 6.8, 3.6)<br>1.44 (CH <sub>2</sub> , ddd, 14.0, 10.7, 3.3) |
| 5                                   | 21.4                       | 1.79 (CH <sub>2</sub> , m)<br>1.60 (CH <sub>2</sub> , m)                                      |
| 6                                   | 55.2                       | 2.11 (CH, ddd, 9.0, 9.0, 6.3)                                                                 |
| 2-C(CH <sub>3</sub> )               | 146.6                      | -                                                                                             |
| 2-C(CH <sub>3</sub> ) <sub>2</sub>  | 23.5                       | 1.69 (CH <sub>3</sub> , s)                                                                    |
|                                     | 24.2                       | 1.74 (CH <sub>3</sub> , s)                                                                    |
| 3-CH <sub>3</sub>                   | 24.5                       | 1.29 (CH <sub>3</sub> , s)                                                                    |
| 3-CHCH <sub>2</sub>                 | 146.4                      | 5.83 (CH, dd, 10.4, 17.9)                                                                     |
| 3-CHCH <sub>2</sub>                 | 110.7                      | 4.91 (CH <sub>2</sub> , dd, 10.4, 1.2)<br>4.90 (CH <sub>2</sub> , dd, 17.9, 1.2)              |
| 6-CH(CH <sub>3</sub> ) <sub>2</sub> | 29.4                       | 2.00 (CH, m)                                                                                  |
| 6-CH(CH <sub>3</sub> ) <sub>2</sub> | 18.4                       | 0.79 (CH <sub>3</sub> , d, 6.8)                                                               |
|                                     | 20.6                       | 0.84 (CH <sub>3</sub> , d, 6.8)                                                               |

<sup>a</sup>Reference value can be found in M. Niwa et al. Chem. Lett. 1977, 12, 1415-1418<sup>b</sup>Calculated <sup>13</sup>C shift of HSQC- and HMBC-NMR experiments. Spin systems evaluated by HSQC-NMR experiment<sup>c</sup>Reference data can be found in P. Weyerstahl et al. Liebigs Ann. Chem. 1987, 2, 89-101

**Table S5.** Spectral characterization data for (6) (NMR spectra recorded in CDCl<sub>3</sub>)**(-)-Acorenone**

CAS Nr.: 5956-05-8

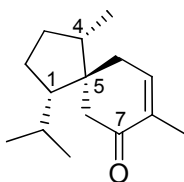 $m/z$  (ESITOFMS) 243.1730 [M+Na<sup>+</sup>] (Calc.: 243.1719) $[\alpha]_D$  (21.5°C) -27° ( $c = 0.37$ , CHCl<sub>3</sub>)<sup>a</sup>

| position                            | $\delta_C$ <sup>a, b</sup> | $\delta_H$ (I, m, J in Hz) <sup>a, c</sup> |
|-------------------------------------|----------------------------|--------------------------------------------|
| 1                                   | 56.9                       | 1.24 (CH, m)                               |
| 1-CH(CH <sub>3</sub> ) <sub>2</sub> | 28.9                       | 1.49 (CH, o, 6.5)                          |
| 1-CH(CH <sub>3</sub> ) <sub>2</sub> | 21.5                       | 0.73 (CH <sub>3</sub> , d, 6.8)            |
|                                     | 24.0                       | 0.84 (CH <sub>3</sub> , d, 6.8)            |
| 2                                   | 25.4                       | 1.24 (CH <sub>2</sub> , m)                 |
|                                     |                            | 1.60 (CH <sub>2</sub> , m)                 |
| 3                                   | 29.9                       | 1.14 (CH <sub>2</sub> , m)                 |
|                                     |                            | 1.57 (CH <sub>2</sub> , m)                 |
| 4                                   | 47.0                       | 1.57 (CH, m)                               |
| 4-CH <sub>3</sub>                   | 16.1                       | 0.70 (CH <sub>3</sub> , d, 6.8)            |
| 5                                   | 47.9                       | -                                          |
| 6                                   | 38.8                       | 2.16 (CH <sub>2</sub> , d, 16.6)           |
|                                     |                            | 2.21 (CH <sub>2</sub> , d, 16.6)           |
| 7                                   | 200.3                      | -                                          |
| 8                                   | 134.6                      | -                                          |
| 8-CH <sub>3</sub>                   | 15.6                       | 1.63 (CH <sub>3</sub> , s)                 |
| 9                                   | 144.4                      | 6.54 (CH, s)                               |
| 10                                  | 37.4                       | 2.01 (CH <sub>2</sub> , dm, 19.9)          |
|                                     |                            | 2.53 (CH <sub>2</sub> , dm, 19.9)          |

<sup>a</sup>Reference value can be found in S.W. Baldwin et al., Tetrahedron Lett. 1982, 23, 1235-1238<sup>b</sup>Calculated <sup>13</sup>C shift of HSQC- and HMBC-NMR experiments. Spin systems evaluated by HSQC-NMR experiment<sup>c</sup>Reference data can be found in W. Rascher et al., Tetrahedron, 33, 575-577

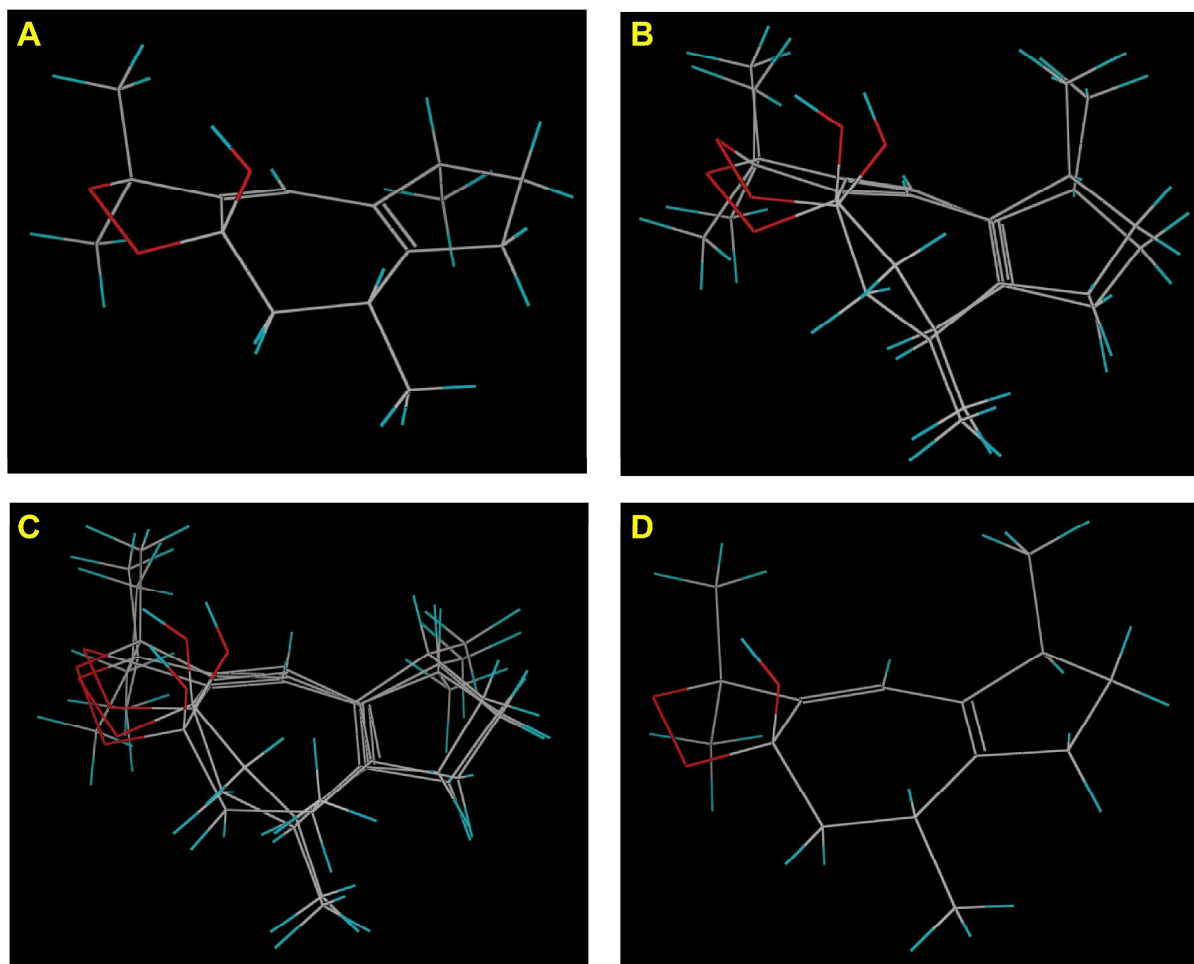

**Figure S1:** Predominant conformers of the four possible stereoisomers of (+)-dioxosarcoguaiacol (**2**) within a 1 kcal/mol energy window from the particular global minimum. Conformational analysis was performed at the OPLS\_2005 level in chloroform. A: 4*R*\*8*S*\*10*R*\*, B: 4*S*\*8*S*\*10*S*\*, C: 4*R*\*8*S*\*10*S*\*, D: 4*S*\*8*S*\*10*R*\*

**Table S6.** Comparison of NMR Data ( $^3J_{\text{HH}}$ -Coupling Constants and NOESY Correlations) with Geometrically Optimized Conformers of the Four Stereoisomers of (+)-Dioxosarcoguaiacol (**2**)

| NMR observations                               | Matching geometrically optimized conformers <sup>a</sup> |            |            |            |
|------------------------------------------------|----------------------------------------------------------|------------|------------|------------|
|                                                | 4R*8S*10R*                                               | 4S*8S*10R* | 4R*8S*10S* | 4S*8S*10S* |
| $J_{2b,3b} = 0$ Hz ,<br>NOESY: H-3b ↔ H-2a     | yes                                                      | yes        | yes        | yes        |
| $J_{9b,10} = 5.2$ Hz,<br>$J_{9a,10} = 13.4$ Hz | yes                                                      | yes        | yes        | yes        |
| NOESY: H-6 ↔ H-12,13                           | yes                                                      | yes        | no         | no         |
| NOESY: H-2a ↔ H-15                             | yes                                                      | yes        | no         | no         |
| NOESY: H-3a ↔ H-4,<br>H-3b ↔ H-14              | yes                                                      | no         | no         | yes        |

<sup>a</sup>Conformers were found by conformational analysis in CHCl<sub>3</sub> and further geometrically optimized based on Density function theory (DFT) on the B3LYP/6-31G\* level in gas-phase.



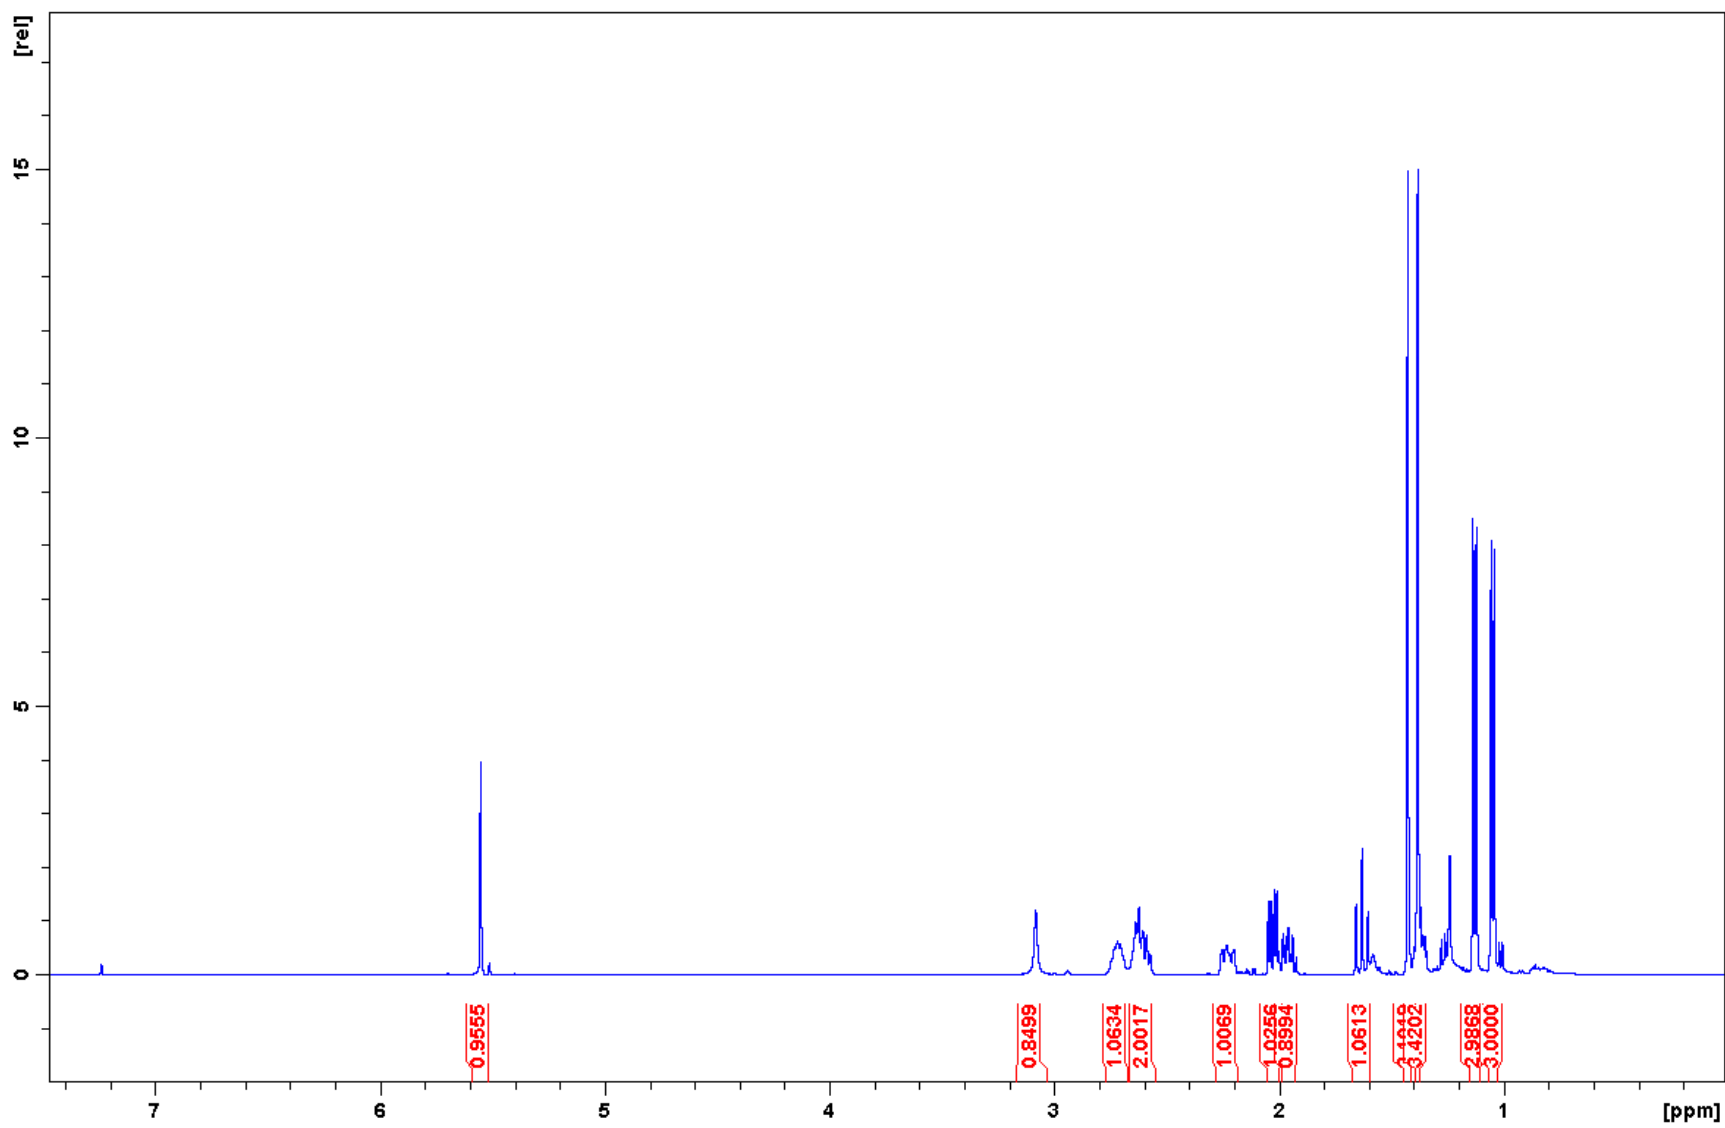

**Figure S2.** <sup>1</sup>H-NMR spectrum of (2) (NS: 64, DS: 2, CDCl<sub>3</sub>).

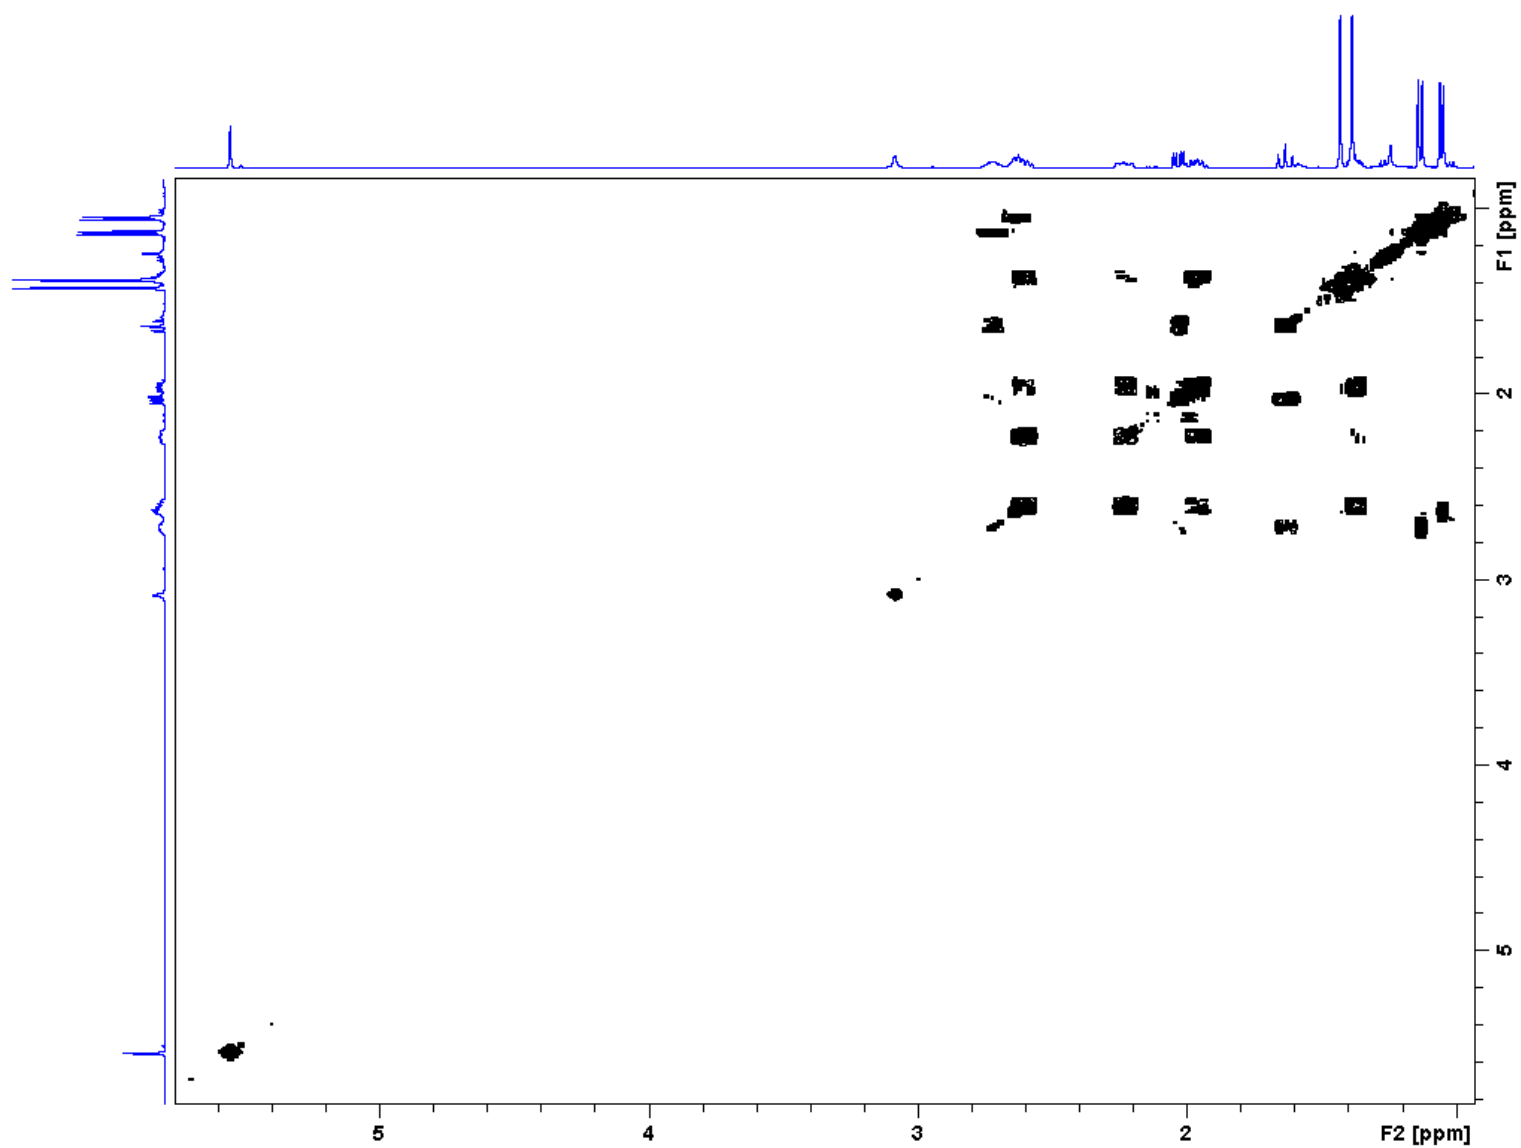

**Figure S3.** COSY-NMR spectrum (*cosygpqf*, NS: 4, DS: 8) of **(2)** in CDCl<sub>3</sub>.

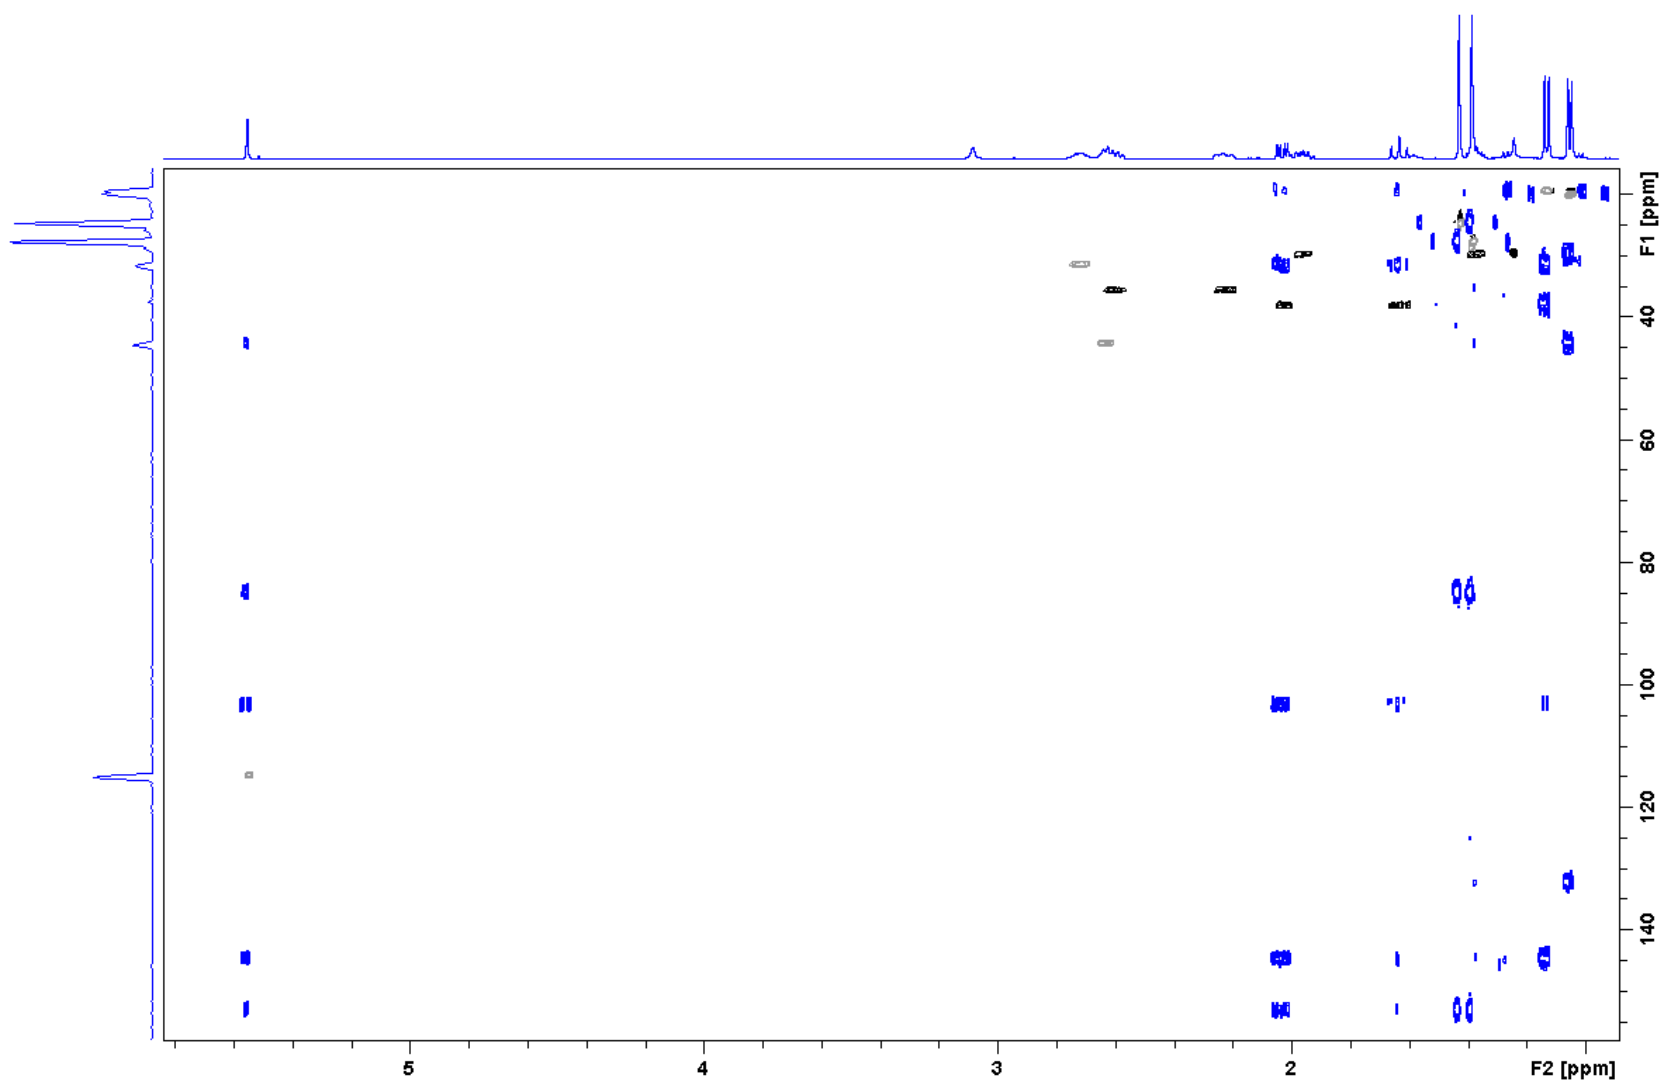

**Figure S4.** Overlay of DEPTedited HSQC-NMR spectrum (*hsqcedetgp*, NS: 8, DS: 16; black/grey) and HMBC spectrum (*hmbcgp*, NS: 128, DS: 16, optimized for 10 Hz; blue) of (**2**) in CDCl<sub>3</sub>.

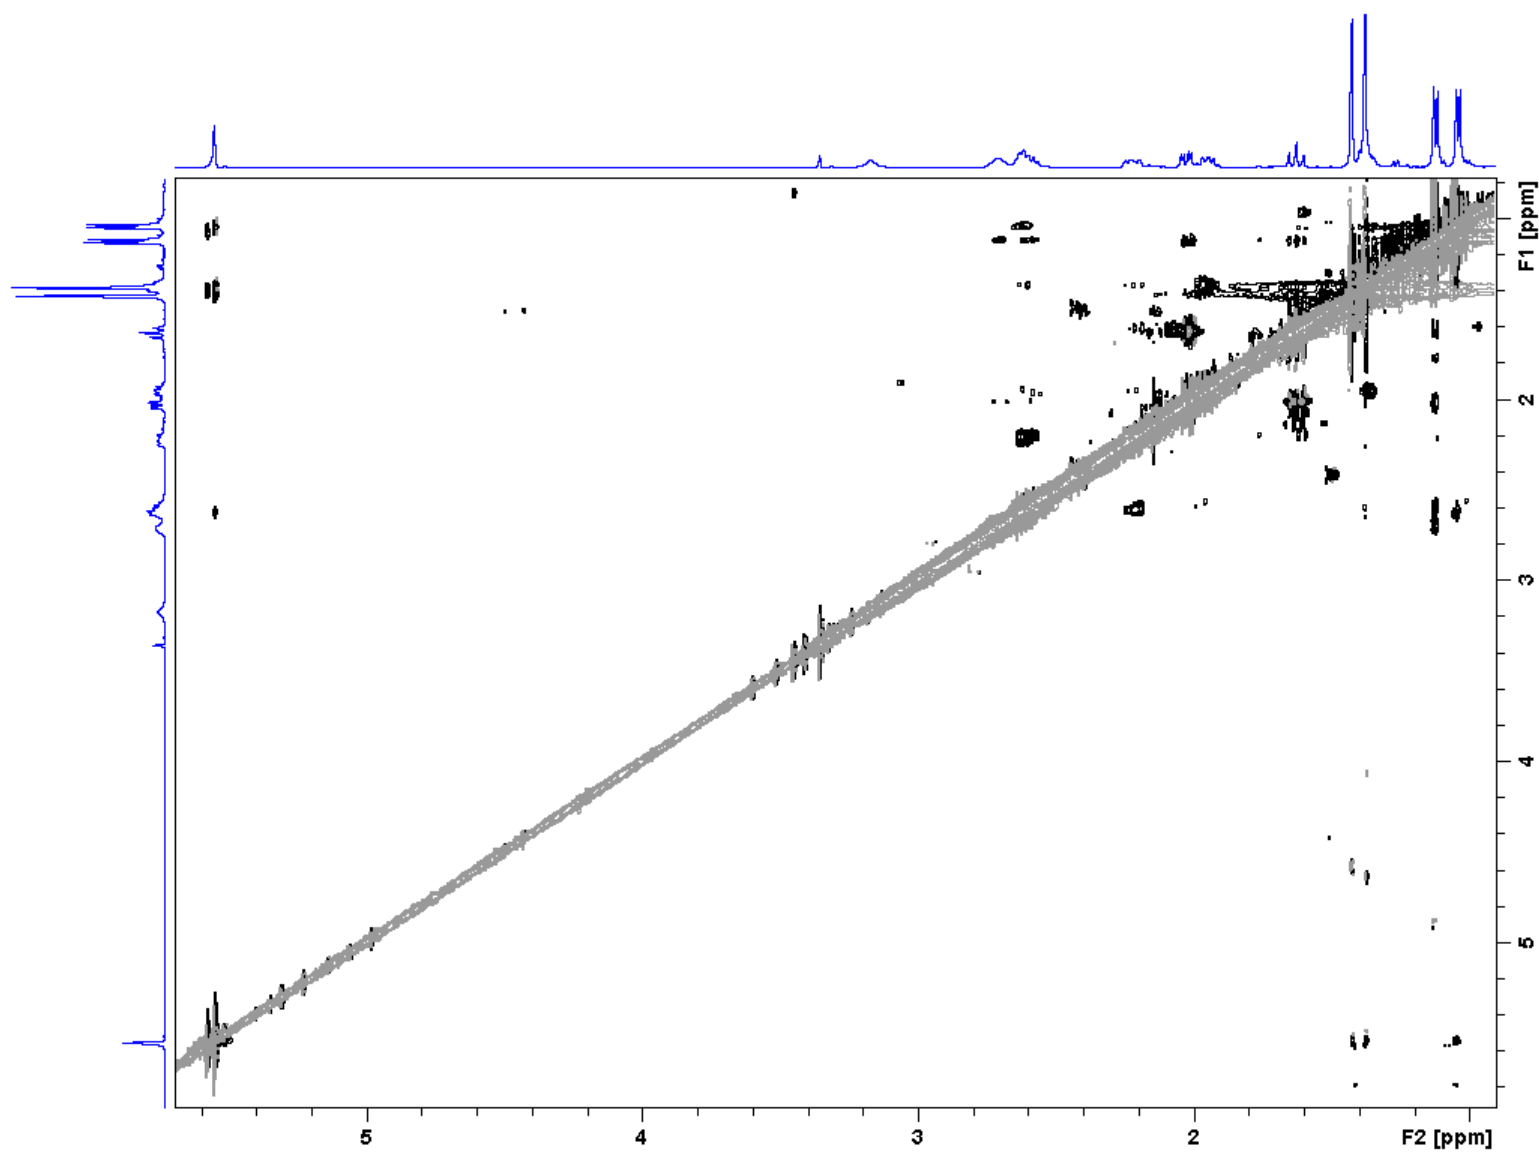

**Figure S5.** NOESY NMR spectrum (*noesygp phpp*, NS: 32, DS: 16, mixing time 0.75 s) of (2) in  $\text{CDCl}_3$ .
